# Supplementary material for: A comparison of three simple approaches to identify critical areas for runoff and dissolved reactive phosphorus losses
Source: Copernicus journal article supplement (doi:10.5194/hess-18-2975-2014), 2014-08-13
Supplement: Supplementary file 1 [file hess-18-2975-2014-supplement.pdf]

Supplement of Hydrol. Earth Syst. Sci., 18, 2975–2991, 2014  
<http://www.hydrol-earth-syst-sci.net/18/2975/2014/>  
doi:10.5194/hess-18-2975-2014-supplement  
© Author(s) 2014. CC Attribution 3.0 License.

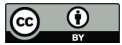

*Supplement of*

## **A comparison of three simple approaches to identify critical areas for runoff and dissolved reactive phosphorus losses**

**C. Hahn et al.**

*Correspondence to:* C. Hahn (claudia.hahn@alumni.ethz.ch)

Lippenrütibach catchment

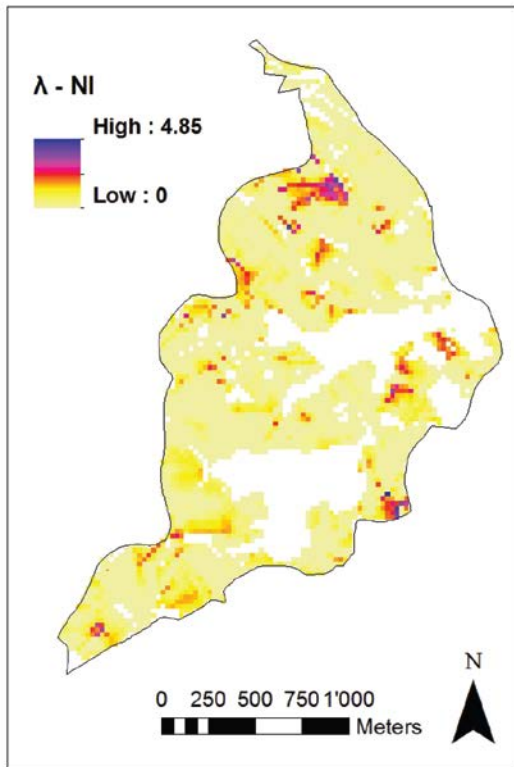

Stägbach catchment

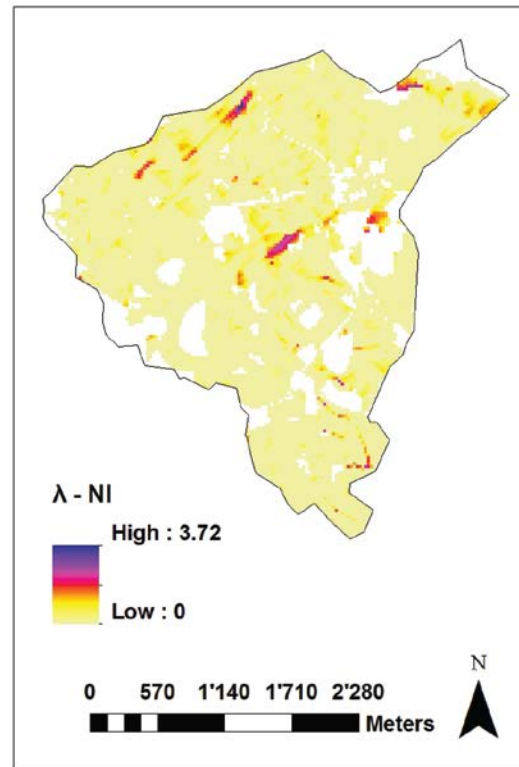

Fig. S1: Spatial distribution of the difference between Network Index (NI) and Topographic Index ( $\lambda$ ) in the Lippenrütibach and the Stägbach catchment, indicating where connectivity might be a limiting factor for P loss into streams within the catchment.
